# Supplementary material for: Air-sea interaction heat and momentum fluxes based on vessel’s experimental observations over Spanish waters
Source: Copernicus journal article supplement (doi:10.5194/essd-2024-597), 2025-02-11
Supplement: Supplementary file [file essd-2024-597-AC3-supplement.pdf]

*Additional changes beyond the responses to the referee comments*

- Line 79 : “Also, different regional wind regimes, **so important for the air-sea interaction**, are characteristic **for** each region” changed to “Also, different regional wind regimes, **crucial for air-sea interaction**, are characteristic **of** each region”.
- Line 93: “**allowing to measure**” changed to “**allowing them to measure**”.
- Line 167: “experimental and technical **constrictions**” changed to “experimental and technical **constraints**”.
- Line 240 : “**November and December months**” changed to “**November and December**”.
- Line 310: “The Atlantic Meridional Overturning Circulation (AMOC) accounts for **the most of the**” changed to “The Atlantic Meridional Overturning Circulation (AMOC) accounts for **most of the**”.
- Line 329: “**which contributes to**” changed to “**which contribute to**”.
- Line 342: “Thus, this heterogeneous character encourages the subdivision **in** different regions proposed in this study.” changed to “Thus, this heterogeneous character encourages the subdivision **into** different regions proposed in this study.”
- Line 417: **Clayson, C. A., Roberts, J. B., and Bogdanoff, A.: SEAFUX Version 1: a new satellitebased ocean-atmosphere turbulent flux dataset, Int J Climatol (submitted), 2014.** removed, and **Curry, J., Bentamy, A., Bourassa, M., Bourras, D., Bradley, E., Brunke, M., Castro, S., Chou, S., Clayson, C., Emery, W., et al.: Seaflux, Bulletin of the American Meteorological Society, 85, 409–424, <https://doi.org/10.1175/BAMS-85-3-409>, 2004** added instead.  
Also, in line 44, (**Clayson et al., 2014**) changed to (**Curry et al., 2004**).
